# Supplementary material for: Normal Alpha-Fetoprotein Hepatocellular Carcinoma: Are They Really Normal?
Source: MDPI journal article supplement (doi:10.3390/jcm8101736), 2019-10-19
Supplement: s1 [file s1]

**Table S1 – IHC<sup>a</sup> characteristics of N-HCC<sup>b</sup> vs. A-HCC<sup>c</sup> (n=114)**

| Variables                | Total    |     | N-HCC <sup>b</sup> |     | A-HCC <sup>c</sup> |     | P-value <sup>g</sup> |              |
|--------------------------|----------|-----|--------------------|-----|--------------------|-----|----------------------|--------------|
|                          | No.      | (%) | No.                | (%) | No.                | (%) |                      |              |
| <b>GPC3<sup>d</sup></b>  | Positive | 80  | (70.2%)            | 44  | (65.7%)            | 36  | (76.6%)              | <b>0.173</b> |
|                          | Negative | 34  | (29.8%)            | 23  | (34.3%)            | 11  | (23.4%)              |              |
| <b>CDH17<sup>e</sup></b> | Positive | 6   | (5.3%)             | 3   | (4.9%)             | 3   | (5.7%)               | <b>0.859</b> |
|                          | Negative | 108 | (94.7%)            | 58  | (95.1%)            | 50  | (94.3%)              |              |
| <b>CK19<sup>f</sup></b>  | Positive | 16  | (14.0%)            | 3   | (5.0%)             | 13  | (24.1%)              | <b>0.003</b> |
|                          | Negative | 98  | (86.0%)            | 57  | (95.0%)            | 41  | (75.9%)              |              |

<sup>a</sup> Immunohistochemical study

<sup>b</sup> Normal  $\alpha$ -fetoprotein hepatocellular carcinoma

<sup>c</sup> Abnormal  $\alpha$ -fetoprotein hepatocellular carcinoma

<sup>d</sup> Glypican-3

<sup>e</sup> Cadherin-17

<sup>f</sup> Cytokeratin-19

<sup>g</sup> N-HCC vs. A-HCC; Pearson's  $\chi^2$  test was used to analyze the categorical variables
